# Supplementary material for: Intense Beauty Requires Intense Pleasure
Source: PubMed Central journal article supplement (PMC6848232; doi:10.3389/fpsyg.2019.02420), 2019-11-05

### Image set 1

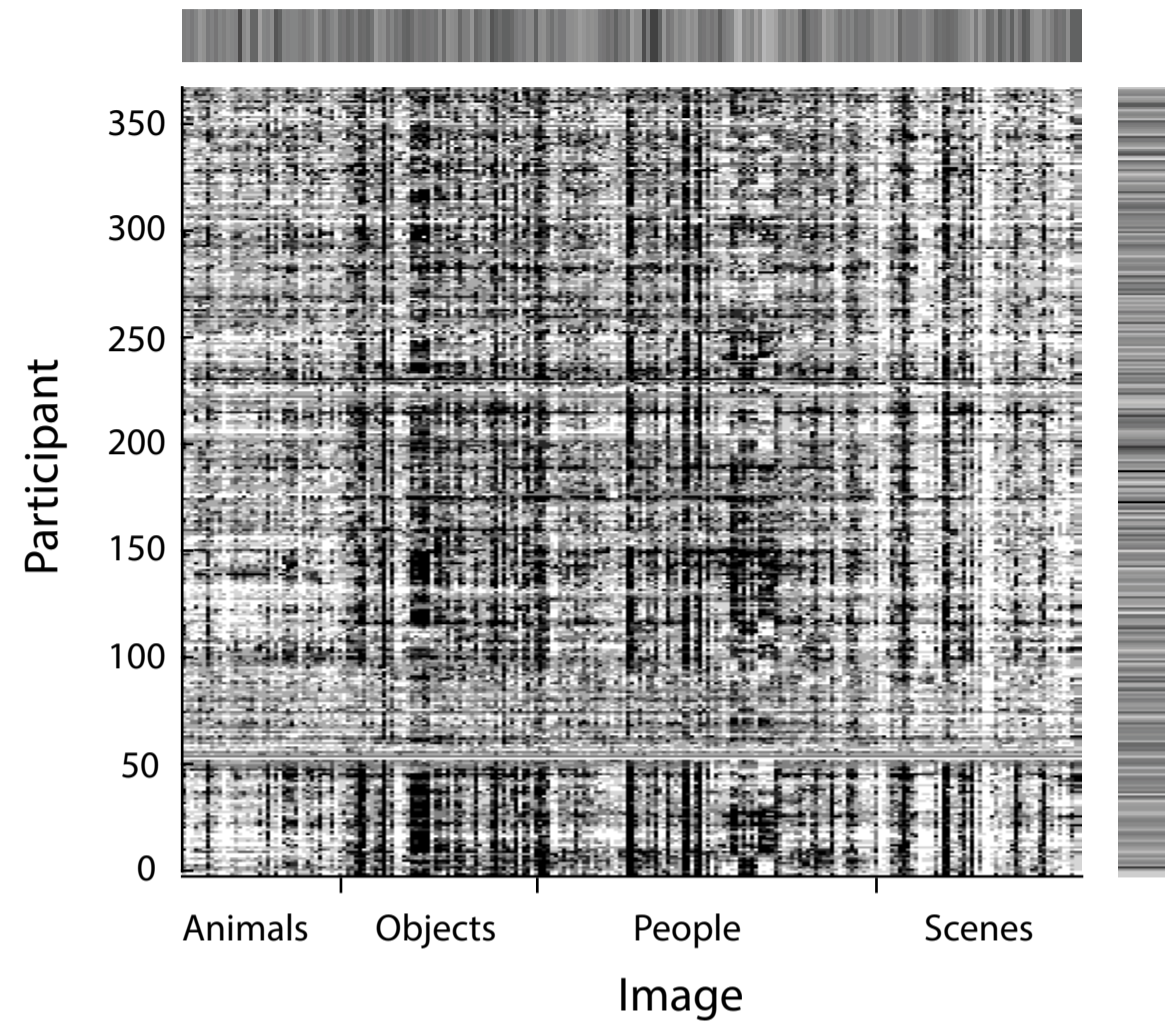

### Image set 2

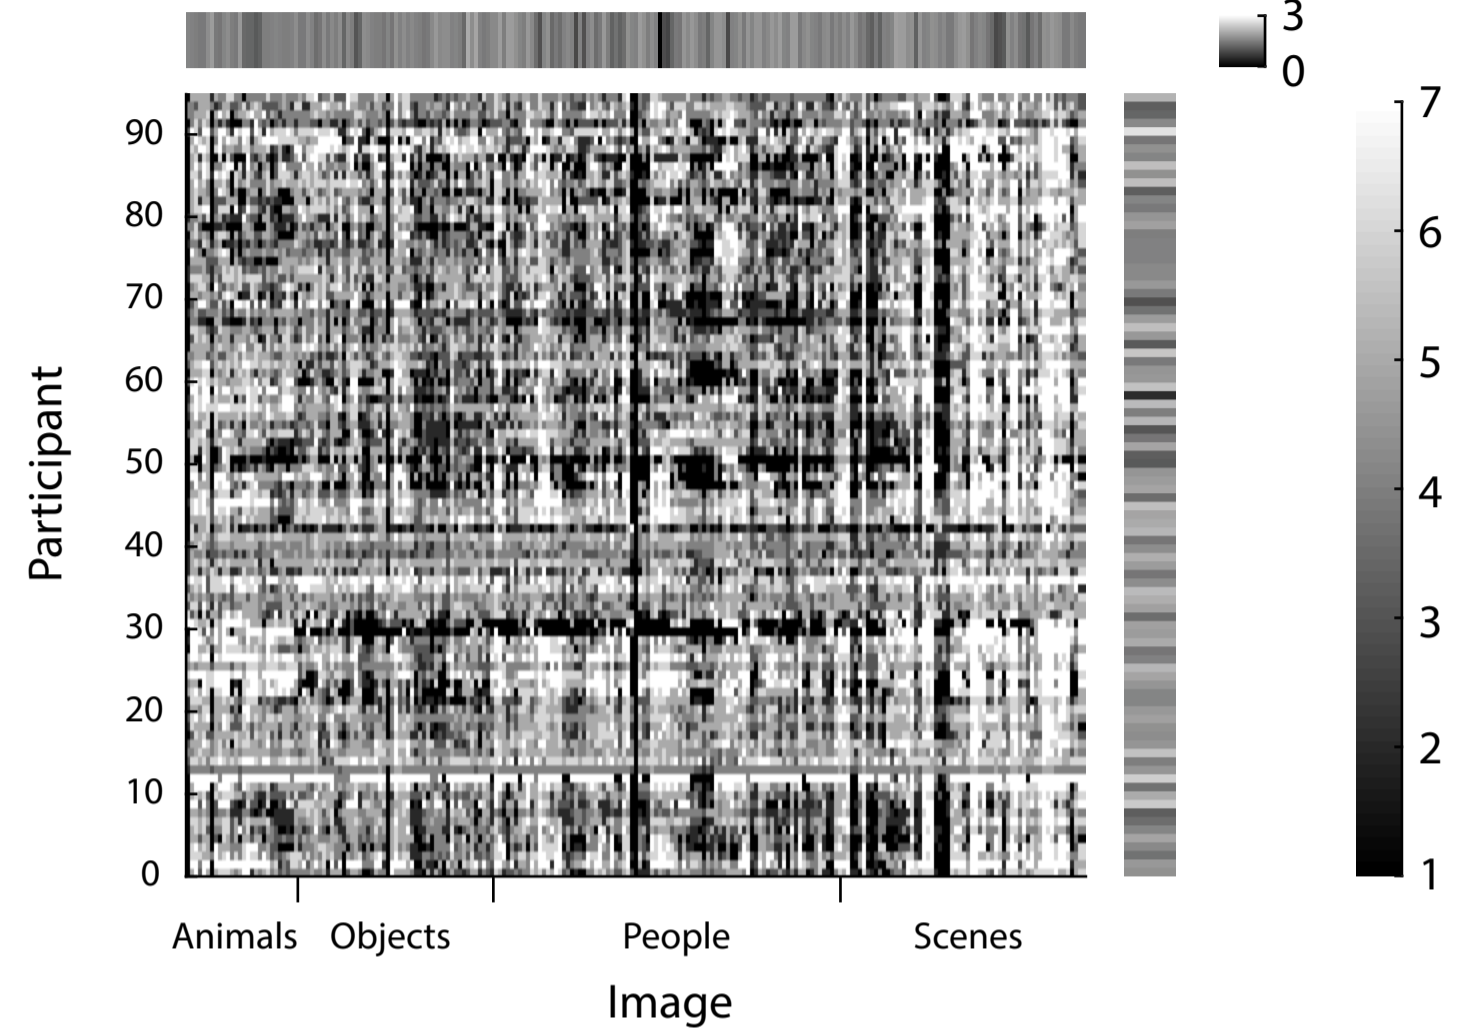

### Image set 3

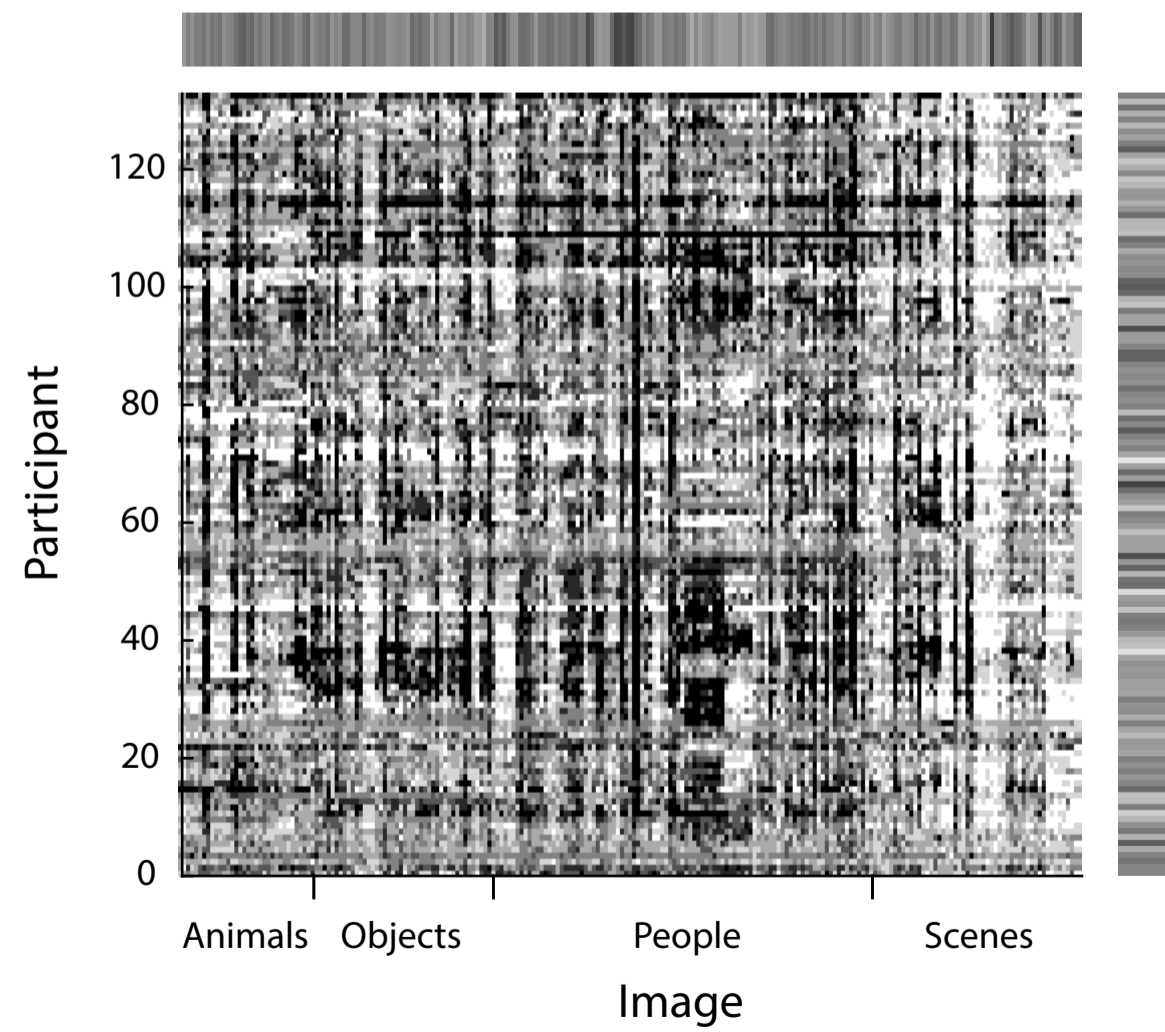

### Image set 4

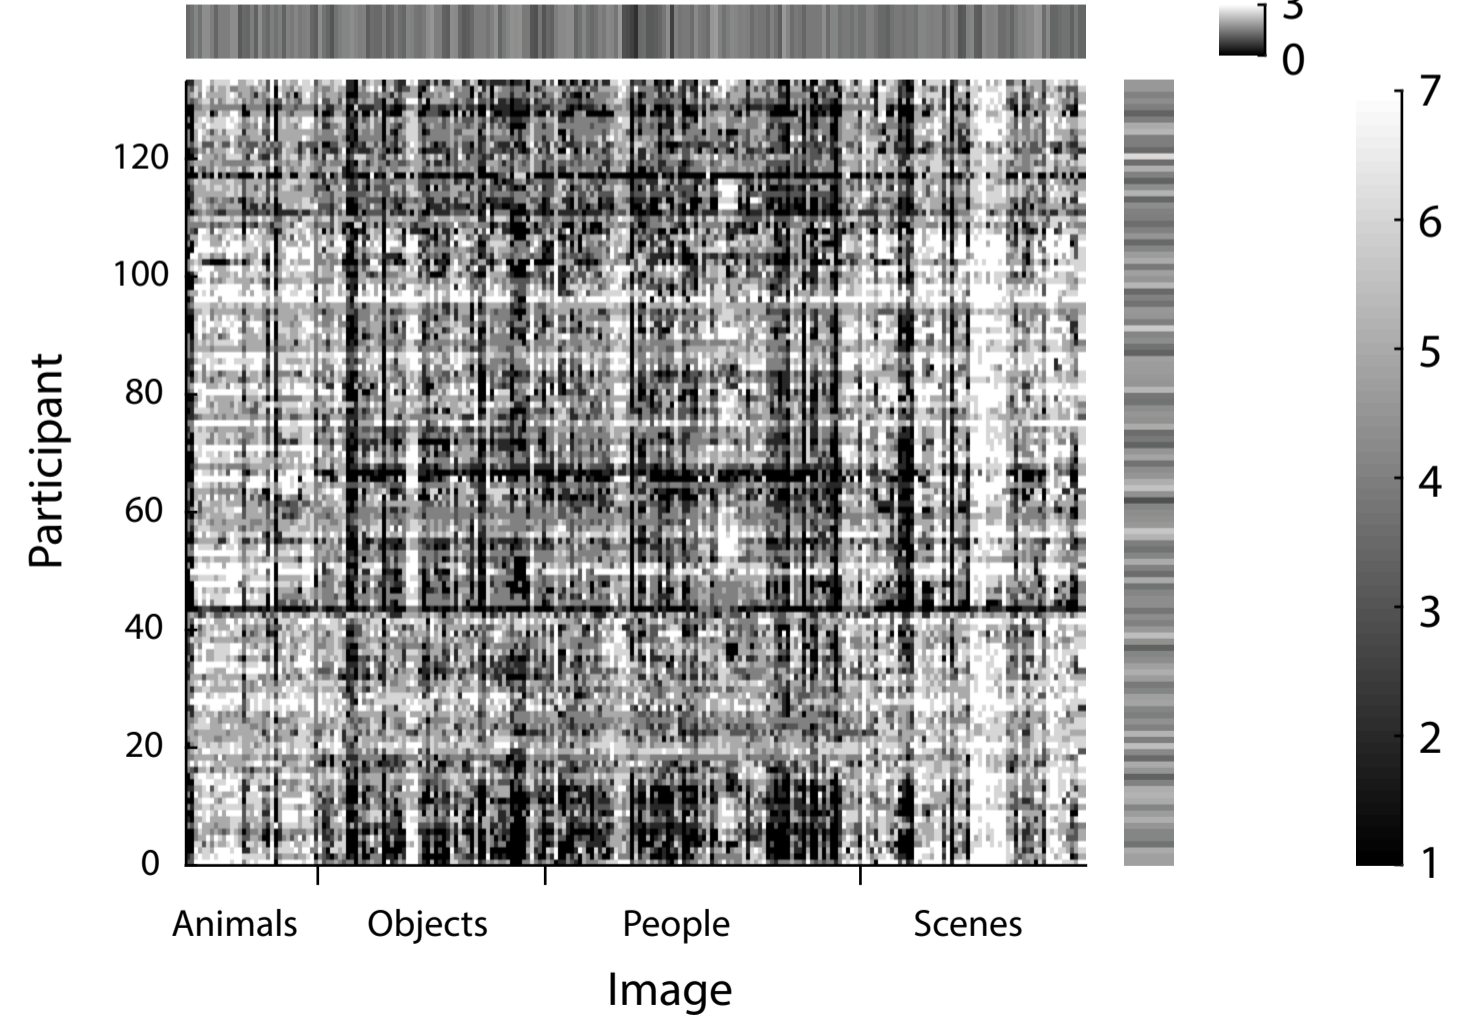

Supplement: Image_1.pdf [file Image_1.pdf]
