# Supplementary material for: Intense Beauty Requires Intense Pleasure
Source: Front Psychol. 2019 Nov 5;10:2420. doi: 10.3389/fpsyg.2019.02420 (PMC6848232; doi:10.3389/fpsyg.2019.02420)
Supplement: TABLE S1 — List of images used for repeated measures testing. [file Table_1.XLSX]

## Sheet: Sheet1
Set 1			Set 2
ID	Name	Category	ID	Name	Category
37	Baby6	Person	15	Angryface1	Person
44	Bar1	Scene	25	Animalcarcass4	Animal
49	Bark1	Object	40	Baby9	Person
50	Bark2	Object	41	Baby10	Person
52	Bark4	Object	46	Bar3	Scene
56	BDSM1	Person	75	Bird2	Animal
62	Beach4	Scene	90	Boredpose5	Person
91	Boredpose6	Person	97	Bubble1	Object
93	Boxing1	Person	108	Camping6	Person
111	Camping9	Person	128	Cardboard2	Object
142	Cat13	Animal	133	Cat4	Animal
147	Cemetery2	Scene	138	Cat9	Animal
176	Cold6	Person	156	Childlabor4	Person
211	Depressedface1	Person	196	Cups2	Object
212	Depressedface2	Person	222	Dessert5	Object
234	Dirt1	Scene	251	Dog1	Animal
235	Destruction2	Scene	256	Dog6	Animal
247	Doctor6	Person	277	Dog27	Animal
254	Dog4	Animal	313	Fence3	Object
298	Excitedface7	Person	357	Food4	Object
314	Fence4	Object	371	Galaxy1	Scene
334	Fireworks1	Scene	411	Gun1	Object
390	Gazing2	Person	416	Gun6	Object
429	Happypose2	Person	436	House1	Scene
486	Massage1	Person	441	Intensity1	Person
490	Memorial2	Scene	443	Jail2	Scene
498	Miserablepose5	Person	456	Lake2	Scene
523	Neutralface5	Person	481	Lion1	Animal
546	Nudeman7	Person	505	Mother1	Person
579	Nudewoman16	Person	517	Nature2	Scene
581	Nudewoman18	Person	526	Neutralpose3	Person
598	Paper4	Object	529	Nudecouple3	Person
654	Rafting2	Person	542	Nudeman2	Person
657	Rafting5	Person	594	Paintbrush1	Object
680	Roofing3	Person	656	Rafting4	Person
783	Soldiers2	Scene	662	Research1	Object
784	Soldiers3	Person	708	Scaredcat1	Person
785	Soldiers4	Person	722	School7	Scene
817	Surgery2	Person	738	Shot1	Animal
823	Swimming1	Object	756	Skydiving2	Person
855	Tumor1	Person	769	Snake3	Animal
863	Wall5	Object	845	Toilet2	Object
864	War1	Person	870	War7	Person
865	War2	Scene	873	Weapon1	Object
868	War5	Scene	900	Zebra1	Animal
